# Mathematical modelling of SARS-CoV-2 variant outbreaks reveals their probability of extinction

Henrik Schiøler<sup>1</sup>, Torben Knudsen<sup>1</sup>, Rasmus Froberg Brøndum<sup>2,3</sup>,  
Jakob Stoustrup<sup>1</sup>, Martin Bøgsted<sup>2,3</sup>

<sup>1</sup>Department of Electronic Systems, Aalborg University

<sup>2</sup>Department of Clinical Medicine, Aalborg University

<sup>3</sup>Department of Haematology, Aalborg University Hospital

## Abstract

When a virus spreads, it may mutate into, e.g., vaccine resistant or fast spreading subtypes, as was the case for the Danish Cluster-5 mink, the British B.1.1.7, and the South African 501Y.V2 variants of the SARS-CoV-2 virus. A way to handle such spreads is through a containment strategy, where the population in the affected area is isolated until the spread has been stopped. Under such circumstances, it is important to monitor whether the mutated virus is extinct via massive testing for the virus sub-type. If successful, the strategy will lead to lower and lower numbers of the sub-type, and it will eventually die out. An important question is, for how long time one should wait to be sure the sub-type is extinct? We use a hidden Markov model for infection spread and an approximation of a two stage sampling scheme to infer the probability of extinction. The potential of the method is illustrated via a simulation study. Finally, the model is used to assess the Danish containment strategy when SARS-CoV-2 spread from mink to man during the summer of 2020, including the Cluster-5 sub-type. In order to avoid further spread and mink being a large animal virus reservoir, this situation led to the isolation of seven municipalities in the Northern part of the country, the culling of the entire Danish 17 million large mink population, and a bill to interim ban Danish mink production until the end of 2021.

## 1 Introduction

Pandemic outbreaks have reentered as a global reality and threat to humanity with the transmission of an animal-adapted Corona virus to humans, first detected in Wuhan, China in late 2019, leading to the COVID-19 pandemic exhibiting frequent severe respiratory problems in humans. Early warnings of a global event were seen with SARS and avian flu [3, 7]. In both cases early containment measures proved successful, whereas for SARS-CoV-2 early containment failed and the strategy transferred to mitigation. This pattern has later been re-observed in almost all countries at the early stages of COVID-19 introduction across national borders. Lately, human-animal transmission has given rise to grave concerns regarding a re-ignition of the pandemic through

resistant mutations cultivated in animal reservoirs [9]. One such example is the discovery of the Cluster-5 mutation in humans transferred from farmed mink in the Danish fur industry during the summer of 2020 [2]. National and global health concerns triggered severe disease containment measures, such as the rapid culling of the entire Danish 17 million large stock of mink as well as relatively severe social- and travel-restrictions for seven municipalities in the North Denmark Region (approx. 281,000 people). Containment measures were, for various reasons, delayed for around four weeks, in which there were no observations of Cluster-5 mutations in a subset of polymerase chain reaction (PCR) tested samples subjected to whole genome sequencing (WGS). This has led to the obvious question, for how long should Cluster-5 be absent from test samples before its extinction is sufficiently certain? The answer depends on the epidemiological behaviour of the disease during restrictions as well as the testing regime imposed in that period. We aim in this paper to provide a Bayesian model-based answer to this question which links epidemiological parameters as well as testing patterns and test results to the probability of disease extinction and early detection.

Various modeling levels exist in epidemiology such as compartment models, aggregate Markov models, and individual Markov models [1]. Whereas the former two, including the well known SIR and SEIR models [5], are well suited to model the epidemic spread for large populations during mitigation, the latter provides higher precision for small amounts of infected during containment. Other recent investigations have been made to model the early epidemic evolution of SARS-CoV-2, employing auto-regressive modeling with a Bayesian approach to parameter estimation [8]. Such models provide mean value predictions but do not give the probabilistic output as requested above. The scale of genomic surveillance needed for early detection of newly emerging variants of concern (VoC) has been considered through a model of the sampling process including the PCR test quality parameters [10]. However, in this model, only the output model is considered, in contrast to our model, where also the epidemic dynamics are included. Furthermore, results are given as expected counts in contrast to the probabilistic results of our approach. A generalized *Hidden* Markovian model framework for epidemic evolution and test has also been employed [11]. One may consider the model class used in this paper as a subset of that model, tailored specifically to early epidemic development, which brings about a much required computational tractability even for large populations.

We shall shortly introduce the development from individual models to compartment models to facilitate the transfer of model parameters between them. The model is generic and can therefore be used in other situations when pathogen mutations are entered from, e.g., animal reservoirs.

## 2 Results

The derivation of the epidemic spread and measurement model was motivated by the spread of mink mutations in the North Denmark Region. Before returning to this, we will formulate the model and study its usability and robustness by running a number of intervention scenarios. In the following we will consider interventions as a combination of restrictions, bringing the reproduction number down, and intensified PCR and WGS sequencing.

## 2.1 Probability of extinction

Assume a situation where we have observed  $y$  infected people carrying a variant we want to keep under control and an effective contamination strategy of infected people and their immediate contacts has been invoked. The question is now: for how long shall we retain the restrictions to be reasonably sure that the virus has not spread? I.e., we want to calculate the following probability

$$p(x_k = 0 | y_0 = y, y_1 = 0, \dots, y_k = 0), k = 1, 2, 3, \dots,$$

where  $x_k$  and  $y_k$  are, respectively, the hidden (true) and observed number of infected people carrying the variant at time  $k$ .

In the Methods section, we have formulated a discrete time hidden Markov model to model this situation where the development of the number of infected people, with the specific variant of interest, follows a birth-death process with death rate (herein recovery rate)  $\gamma$  and net reproduction rate  $R_0$ . The net reproduction rate is defined as the ratio of the birth rate (herein infection rate) versus the death rate, i.e.,  $R_0 = \beta/\gamma$ . We assume a two-step testing strategy where  $n_k$  of the population of size  $N$ , are PCR tested and  $m_k$  of the PCR positive tests are WGS tested at time point  $k$ .

In the following, we compute a number of scenarios which illustrate how various intervention strategies will influence the time until a certain probability of extinction has been reached, given the specific variant has not been observed for a given period of time. In all simulations, we assume a constant recovery time of two weeks, i.e.  $\gamma = 0.5$ , a population size of  $N = 600,000$ ,  $n = 10,000$  tests per week, and an initial number of infected people with the specific variant of 11 as well as a flat prior distribution on the number of specific cases. These numbers were picked to mimic the Cluster-5 outbreak in the North Denmark Region, where 11 cases were observed in a population of size approximately 600,000. Thereafter, we simulated increased restrictions by lowering stepwise the reproduction rate,  $R_0$ , from 1.5 to 0.5. Finally, we studied increased WGS testing rate of positives between 25% and 100%.

In Figure 1, Panel A shows the probability of extinction as a function of the number of weeks for increasing WGS ratio and a constant reproduction rate of  $R_0 = 1.0$ , and Panel B shows the probability of extinction as function of the number of weeks for increasing reproduction rates and constant WGS rate of 0.25. Time to the probability of extinction for all scenarios can be seen in Table 1.

From numerical results, we see that an increase in the ratio of WGS tests dramatically lowers the number of weeks from 42 to 25 before we can conclude a probability of extinction of 90%. We also noticed a counter intuitive non-monotone relationship between reproduction rate and number of weeks until a certain probability of extinction has been achieved. To investigate this further, we computed the number of weeks to a 85%, 90%, and 95% probability of extinction and depicted the number of weeks to extinction against increasing reproduction rates, ranging from 0.5 to 2.5, see Figure 2. From this we notice the maximum of weeks to probability of extinction emerging for reproduction rates  $R_0$  slightly less than one, and decreasing for higher values.

We are aware that it is impossible to set all parameters for a given situation. We have therefore made an online Shiny App which can be used to compute the interested reader's own scenarios, please refer to the Data availability section.

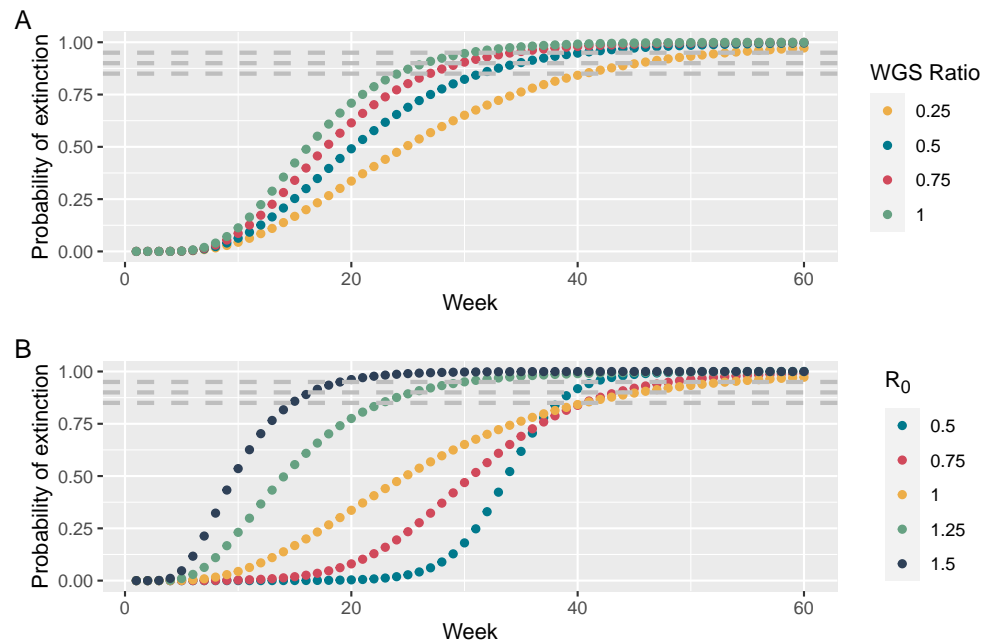

Figure 1: Probability of extinction as a function of the number of weeks with no observations of the specific variant. Dashed lines indicate probability levels 0.85, 0.90, and 0.95, respectively. (A) Variation of testing regime for a constant reproduction rate of  $R_0 = 1$ . (B) Variation of restrictions ( $R_0$ ) for a constant WGS testing ratio of 0.25. The yellow curves are identical in the two plots.

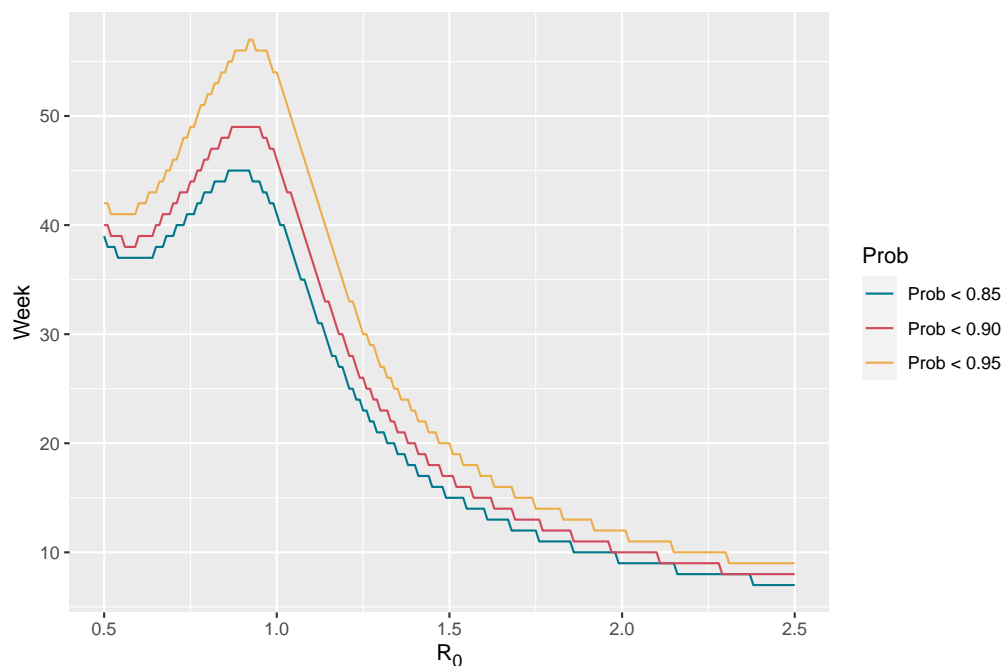

Figure 2: Weeks to extinction as function of the reproduction rate,  $R_0$ .

Table 1: Weeks to thresholds for various testing and restriction strategies.

| Ratio | $R_0$ | Prob < 0.85 | Prob < 0.90 | Prob < 0.95 |
|-------|-------|-------------|-------------|-------------|
| 0.25  | 0.50  | 39          | 40          | 42          |
|       | 0.75  | 41          | 44          | 49          |
|       | 1.00  | 41          | 46          | 54          |
|       | 1.25  | 23          | 26          | 30          |
|       | 1.50  | 15          | 17          | 20          |
| 0.5   | 0.50  | 28          | 30          | 32          |
|       | 0.75  | 34          | 36          | 40          |
|       | 1.00  | 32          | 35          | 41          |
|       | 1.25  | 21          | 23          | 27          |
|       | 1.50  | 15          | 16          | 19          |
| 0.75  | 0.50  | 26          | 27          | 30          |
|       | 0.75  | 30          | 32          | 36          |
|       | 1.00  | 27          | 30          | 35          |
|       | 1.25  | 20          | 22          | 25          |
|       | 1.50  | 14          | 16          | 18          |
| 1     | 0.50  | 24          | 26          | 28          |
|       | 0.75  | 27          | 29          | 32          |
|       | 1.00  | 25          | 27          | 31          |
|       | 1.25  | 18          | 20          | 23          |
|       | 1.50  | 14          | 15          | 17          |

## 2.2 Analysis of the Cluster-5 extinction in Denmark

Denmark has a total population of 5.8 million and is divided into 98 municipalities which are organized in five administrative regions. The North Denmark Region has 590,000 inhabitants and contains the 11 most northern municipalities, see the coloured municipalities in Figure 3. All population statistics are from December 31, 2020 and have been fetched from the Statbank of Statistics Denmark. For further details see the Data availability section.

The Cluster-5 variant was only observed in the two most northern municipalities Hjørring and Frederikshavn, shown in red in Figure 3. The Figure also shows the seven municipalities covered by the Danish Government’s lock-down (in red and blue), amounting to 281,000 inhabitants.

During a period of 4 weeks from mid August 2020 to mid September 2020 (week no. 35-38), respectively 3, 3, 1, and 4, Cluster-5 observations were made. The public was warned by the authorities against the potential vaccine resistant Cluster-5 variant on November 6, 2020, and it was decided by the authorities to cull the entire 17 million large Danish mink population and lock-down seven municipalities in the North Denmark Region to hinder further spread of the variant. The lock-down was planned to run from November 9, 2020, till December 7, 2020, i.e. week 46 to 49. However, due to low infection rates and heavy political pressure the strict restrictions were removed after only two weeks, i.e. at the beginning of week 47. One of the persisting questions

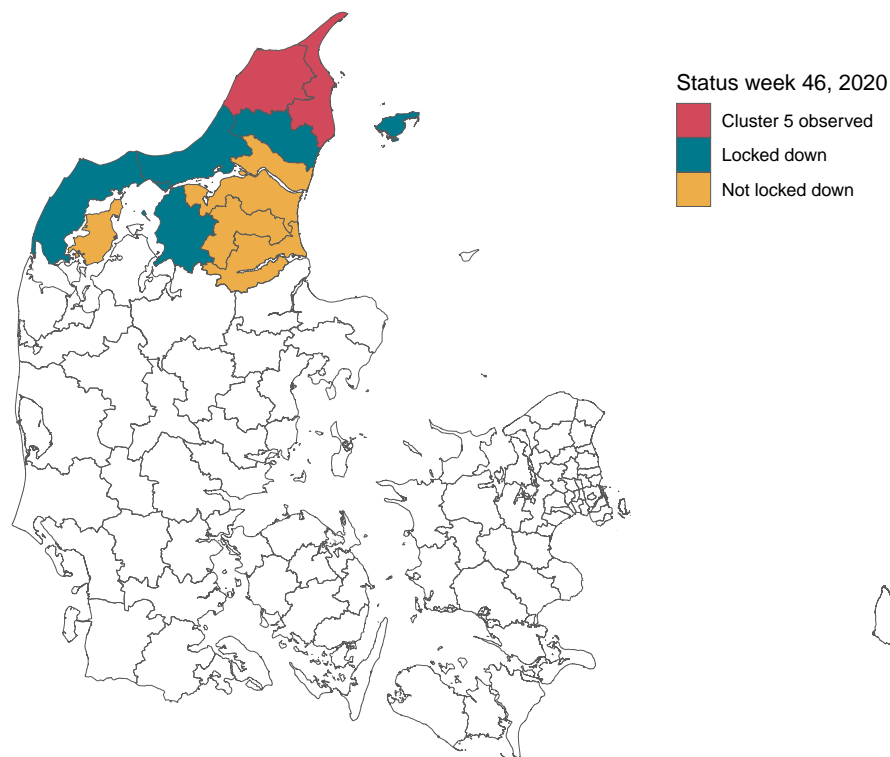

Figure 3: Status for the municipalities in the North Denmark Region following the lock-down order on November 6, 2020. The order was imposed in municipalities with observations of Cluster-5 (red), as well as surrounding municipalities with a high concentration of mink farms (blue). The remaining coloured municipalities belong to the North Denmark Region, but was not locked down. The remaining municipalities in Denmark are coloured white.

from the Danish press and political opposition has been whether Cluster-5 was extinct with a reasonably high probability. In the following, we will try to shed light on this question.

We compare the two situations: planned and actually realized, which apart from the shortened period of intervention mainly differs in the number of WGS tests actually conducted. From publicly available data, we could only get access to week-by-week summary statistics for the entire North Denmark Region. Data from the Cluster-5 outbreak until the end of 2020 can be seen in Table 2. The Data have been obtained from the official Danish Epidemiological Report, for further details see the Data availability section.

We used a population size of 281,000 and divided the number of PCR tests, WGS tests and positives by two, as the locked-down municipalities correspond to approx. half of the population.

Table 2: Weekly test data.

| Week | PCR   | Infected | WGS | Cluster5 |
|------|-------|----------|-----|----------|
| 35   | 22539 | 49       | 25  | 3        |
| 36   | 23758 | 67       | 27  | 3        |
| 37   | 29823 | 233      | 43  | 1        |
| 38   | 40681 | 331      | 74  | 4        |
| 39   | 39789 | 292      | 80  | 0        |
| 40   | 28621 | 260      | 40  | 0        |
| 41   | 29177 | 295      | 47  | 0        |
| 42   | 23125 | 329      | 138 | 0        |
| 43   | 36456 | 679      | 39  | 0        |
| 44   | 52099 | 819      | 177 | 0        |
| 45   | 64493 | 588      | 216 | 0        |
| 46   | 93577 | 485      | 308 | 0        |
| 47   | 95742 | 357      | 246 | 0        |
| 48   | 46120 | 267      | 170 | 0        |
| 49   | 33153 | 387      | 64  | 0        |
| 50   | 51438 | 964      | 104 | 0        |
| 51   | 81265 | 1422     | 344 | 0        |
| 52   | 61935 | 1303     | 362 | 0        |
| 53   | 57121 | 1222     | 270 | 0        |

Further we set the recovery rate to 0.5 (i.e., two weeks) and the reproduction number before intervention to 1.2.

During intervention, the plan was to test the entire population of the municipalities over a 4-week period as well as WGS testing all positive samples. The number of PCR tests were therefore set to  $281,000/4 = 70250$  PCR tests per week. If we assume a positive pct. of 1.5%, we get 1100 positive tests. The test capacity was up to 5000 a week, so we assume all 1100 would be WGS tested during intervention according to the plan. We assume the reproduction rate was decreased to 1.0 during lock-down.

The week-to-week assessment of the probability of extinction from the Cluster-5 outbreak in week 35 till the planned lock-down is depicted in Figure 4. One sees how the probability of extinction develops under the planned intervention strategy and what was realized. We see the probability was 0.22 before the intervention and 0.37 when the restrictions were lifted and 0.7 if the restrictions had been lifted December 3, 2020.

### 3 Discussion

Using Bayes filtering of a hidden Markov model with realistic parameters based on the Cluster-5 variant case from Denmark, we were able to quantify the impact of interventions on the certainty of extinction of deleterious SARS-CoV-2 variants. We found counter-intuitively that imposing

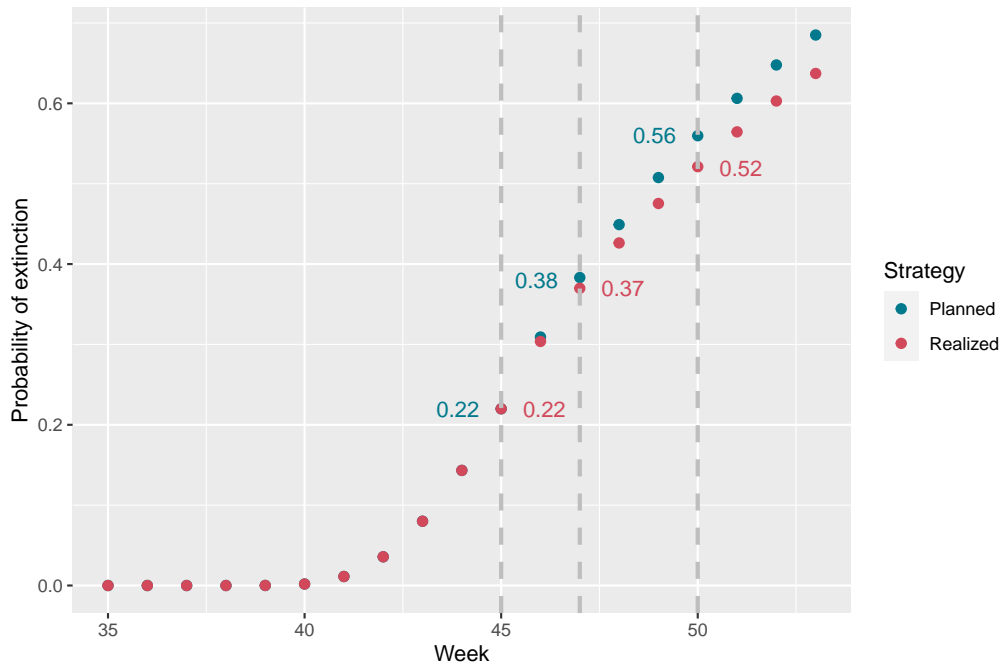

Figure 4: Probability of extinction for planned and realized interventions.

restrictions in general increases the time to certainty of variant extinction, wherefore restrictions should be supplemented by a massive testing strategy. For the Danish case, we concluded a low probability of extinction when the restrictions were lifted at the beginning of week 46. However, at the time of writing (March 1, 2021), the variant has not emerged, so the probability of extinction is now well above 0.95%. However, one should be aware that the calculations are based on rough estimates. The calculations could be made much more exact, if we have had access to the detailed recordings from the Danish authorities.

Although, the use of birth-death processes to model the extinction of species is not new, we have not been able to find previous research with an attempt to calculate the probability of extinction based on hidden information about the birth-death process [6].

The work provides a simple and fast computational framework. This implies a number of scenarios, including sensitivity analyses that can quickly be computed. The simplified model used here is ideal for the initial outbreak of a new variant of concern, whereas other model frameworks such as compartment model (SIR, SEIR) are more well suited later in the epidemic evolution, i.e. when some variant is wider spread.

In conclusion, we hope this tools will be useful for decision makers when deciding upon intervention strategies, that effectively balance restrictions and test strategies.

## 4 Methods

In order to formulate the hidden Markov model, we use the notation in Box 1:



## BOX 1: MATHEMATICAL NOTATION

- Population characteristics
  - $N$  population size
  - $x_k$  number of infected with the specific variant
  - $x'_k$  number of infected with a non-specific variant
  - $x''_k = x_k + x'_k$  total number of infected
- PCR test statistics
  - $n_k$  sample size of the PCR test
  - $z_k$  number of samples with the specific variant
  - $z'_k$  number of samples with a non-specific variant
- WGS test statistics
  - $m_k$  sample size of the WGS test ( $\leq n_k$ )
  - $p_k = m_k/(z_k + z'_k)$  ratio of WGS tested out of positive PCR tests
  - $y_k$  number of samples with the specific variant
- Epidemic parameters
  - $\beta$  infection rate
  - $\gamma$  recovery rate
  - $R_0 = \beta/\gamma$  net reproduction rate

### 4.1 The epidemic model

We first consider the elementary infection dynamics between two persons P1 and P2 of which P1 is infected and P2 is susceptible. Consider an infinitesimal time interval  $[t, t + dt]$  where P1 and P2 are within infection range. Modelling the infection state of P2 as a two-state Continuous Time Markov Chain (CTMC), yields the probability of P1 infecting P2 within  $[t, t + dt]$ , to be  $b dt$ , where  $b$  is a disease characteristic constant.

Consider then a susceptible individual P interacting with a population, comprising  $x$  infected of a population size  $N$ . If it is assumed that P on the average finds  $L$  others within his/her range of infection then the average probability of P being infected within  $[t, t + dt]$  is  $bL \frac{x}{N} dt$ .

Consider next  $S$  susceptible individuals each interacting with a population, comprising  $x$  infected of a population size  $N$ . Then the probability of 1 out of the susceptible individuals being infected in  $[t, t + dt]$  is approximately

$$bL \frac{Sx}{N} dt = \beta \frac{Sx}{N} dt. \quad (1)$$

This leads to the following differential equation governing the evolution of expectations

$$\frac{d}{dt}E(x) = E\left(\beta\frac{Sx}{N}\right) \approx \beta\frac{E(S)E(x)}{N} \quad (2)$$

comprising the infection rate equation of the SIR model. When an *exposed* state is inserted between susceptible and infected states, (2) would yield the rate of transfers between susceptible and exposed states.

Considering instead of expectations, a probability distribution over the actual number of infected  $I$ , (1) leads to

$$P(x(t+dt) = k|x(t) = k-1) = \beta\frac{S(k-1)}{N}dt$$

and with the Bayes law of total probability

$$\begin{aligned} P(x(t+dt) = k) &= P(x(t+dt) = k|x(t) = k-1)P(x(t) = k-1) + P(x(t+dt) = k|x(t) = k)P(x(t) = k) \\ &= \beta\frac{S(k-1)}{N}dtP(x(t) = k-1) + (1 - \beta\frac{Sk}{N}dt)P(x(t) = k) \end{aligned}$$

yielding

$$\frac{P(x(t+dt) = k) - P(x(t) = k)}{dt} = \beta\frac{S(k-1)}{N}P(x(t) = (k-1)) - \beta\frac{Sk}{N}P(x(t) = k).$$

Leading to the differential equation

$$\frac{d}{dt}P(x(t) = k) = \beta\frac{S(k-1)}{N}P(x(t) = k-1) - \beta\frac{Sk}{N}P(x(t) = k)$$

For the early development of an outbreak  $S \approx N$ . This yields the infection dynamics

$$\frac{d}{dt}P(x(t) = k) = \beta(k-1)P(x(t) = k-1) - \beta kP(x(t) = k)$$

Adding the effect of recovery, we obtain

$$\begin{aligned} \frac{d}{dt}P(x(t) = k) &= \beta(k-1)P(x(t) = k-1) - (\gamma + \beta)kP(x(t) = k) + \gamma(k+1)P(x(t) = k+1) \end{aligned}$$

where  $\gamma$  is the individual recovery rate. This can altogether be summarized by the CTMC depicted in Figure 5.

Thus, the number of infected people under the epidemic can be modelled as a continuous time Markov chain (CTMC)  $\{x_t, t \geq 0\}$ , with state space  $X = \{0, 1, 2, \dots, N\}$  and infinitesimal generator  $Q$ , where  $Q$  is a matrix with elements, for  $i, j \in \{1, 2, 3, \dots, N\}$ ,

$$q_{ij} = \begin{cases} i\beta & j = i + 1 \\ i\gamma & j = i - 1 \\ -i(\gamma + \beta) & j = i \\ 0 & \text{Otherwise.} \end{cases}$$

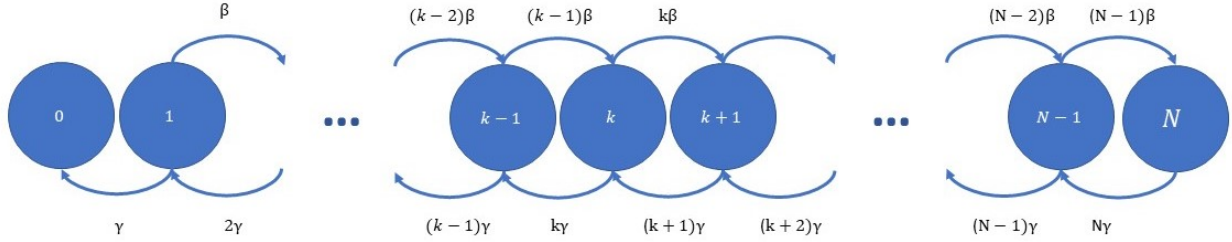

Figure 5: Continuous Time Markov Chain for Cluster-5 infected.

We can now model the daily number of infected in the population as a discretely sampled CTMC  $\{x(n), n = 0, 1, 2, \dots\}$ , with state space  $X = \{0, 1, 2, \dots, N\}$  and transition probabilities

$$x_0 \sim P_0$$

$$p(x_k | x_{1:(k-1)}) = H_{x_{k-1}, x_k}, \quad k = 1, 2, 3, 4, \dots,$$

where  $P_0 = (p(x_0 = 0), p(x_0 = 1), \dots, p(x_0 = N))$  is the initial distribution of  $x_0$  and  $H_{x_{k-1}, x_k}$  is the  $x_{k-1}, x_k$ 'th element of the matrix  $H = \exp(Q dT)$ , with  $dT$  being the sampling period.

The presence of the transmitted virus among humans is first detected through an initial sample of test results  $y_0$ . Therefore the initial conditions for the Bayes filter may be found from

$$p(x_0 | y_0) = \frac{p(y_0 | x_0) p(x_0)}{p(y_0)}. \quad (3)$$

In most cases, if there is no initial evidence for  $x_0$ , then we may (using the principle of maximum entropy) a priori assume  $x_0$  is uniformly distributed over some interval, e.g.  $\{0, \dots, N\}$  (coined uniform in the accompanying R-script). Another possibility is to choose  $x_0$  to have any truncated discrete distribution with support on the set  $\{0, 1, 2, \dots, N\}$ , e.g. the Poisson distribution (coined Poisson distribution in the accompanying R-script). Finally, if we know exactly the initial number of infected, we can choose this number to have probability one. The conditional distribution  $p(y_0 | x_0)$  in Equation (3) can be calculated by the approximations outlined in The observational model section.

In summary, we can illustrate the dependency structure of the Hidden Markov model in Figure 6.

## 4.2 The observation model

Normally, the epidemic model is unobserved, but each day a number of people are tested for infection, and yet a number of the positive samples are sequenced to classify samples into variants. From the sequenced samples, the number of a given variant is recorded. Assuming the number of the PCR and WGS sample sizes,  $n_k$  and  $m_k$ , are known, the sequential sampling scheme can be formulated as a hierarchical model, in the following way:

$$z_k, z'_k | x_k, x'_k \sim \text{Hypergeometric}(N, x_k, x'_k, n_k), \quad (4)$$

$$y_k | z_k, z'_k \sim \text{Hypergeometric}(z_k + z'_k, z_k, m_k). \quad (5)$$

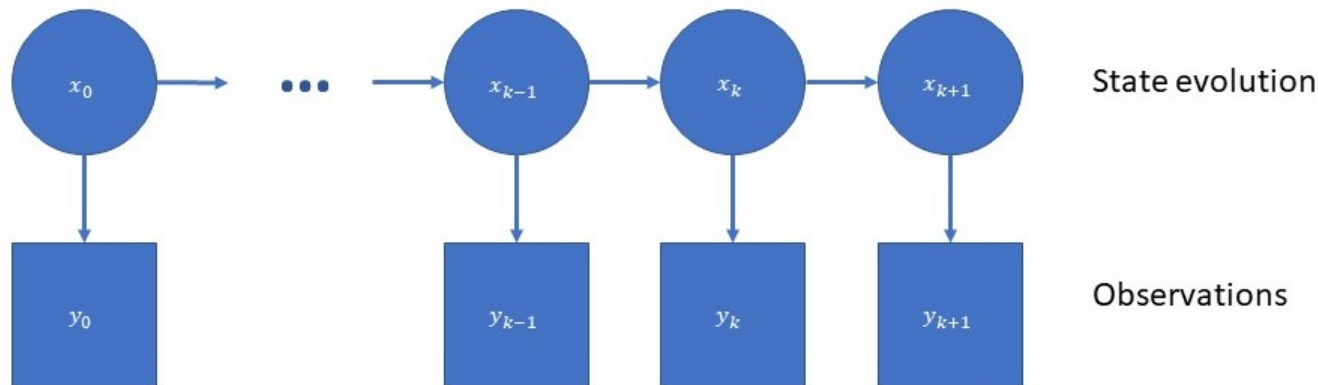

Figure 6: Dependency structure of Bayesian filter

Notice that (4) and (5) are two and one dimensional hypergeometric distributions, respectively. In order to let this be well-defined, we implicitly assume that  $y_k = 0$  if  $z_k = 0$ .

Now, it is possible to formulate an expression for the observational model  $p(y_k|x_k, x'_k)$ , by the following mixture of hypergeometric distributions:

$$p(y_k|x_k, x'_k) = \sum_{i=0}^{\min(x_k, n_k)} \sum_{j=0}^{\min(x'_k, n_k - i)} p(y_k|z_k = i, z'_k = j) p(z_k = i, z'_k = j|x_k, x'_k). \quad (6)$$

However, due to computational complexity of the involved binomial coefficients, we seek approximations of (6). For the given population sizes and infection rates, we would expect a Poisson approximation to  $y_k|x_k, x'_k$ , with a mean value matching the ratio of the specific variant in the population,  $x_k/(x_k + x'_k)$ , times the sample size,  $m_k$ , will provide a good approximation of the distribution of  $y_k|x_k, x'_k$ , i.e.

$$E[y_k|x_k, x'_k] = m_k \frac{x_k}{x_k + x'_k},$$

which leads to the following Poisson distribution approximation (Poisson)

$$y_k|x_k, x'_k \sim \text{Pois} \left( m_k \frac{x_k}{x_k + x'_k} \right).$$

and the following Binomial distribution approximation (Binom1)

$$y_k|x_k, x'_k \sim \text{Binom} \left( m_k, \frac{x_k}{x_k + x'_k} \right).$$

and the following Binomial distribution approximation (Binom2) based on ratios

$$y_k|x_k, x'_k \sim \text{Binom} \left( p_k * n_k, \frac{x_k}{N} \right).$$

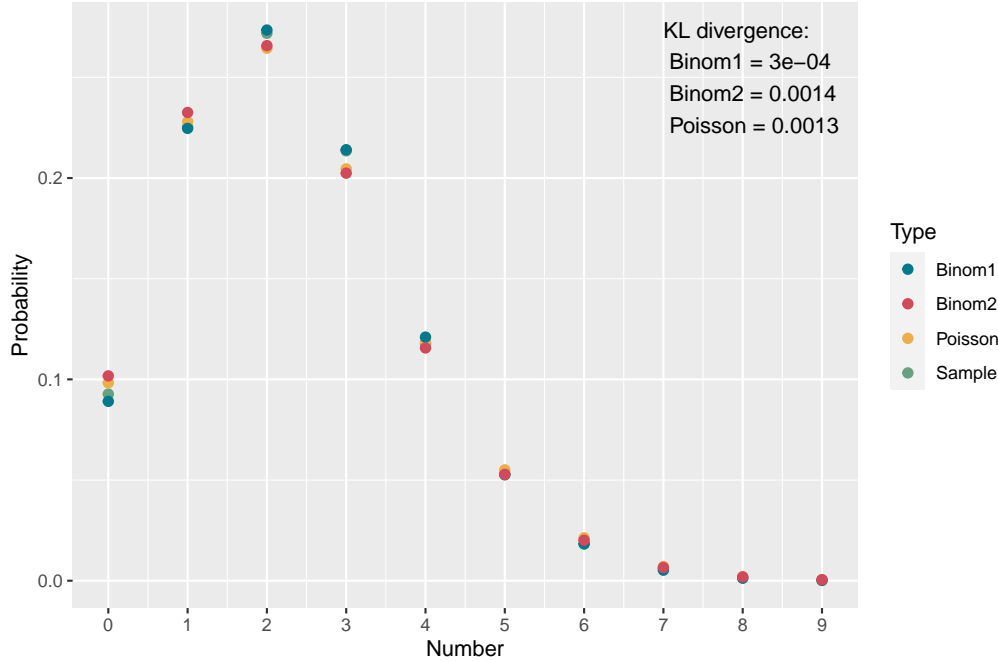

Figure 7: Comparison of approximations and simulated sampling distributions including Kulback-Leibler divergence. Parameters used were  $N = 600,000$ ,  $x'_k = 3,312$ ,  $x_k = 288$ ,  $n_k = 17,000$ , and  $m_k = 29$ .

We simulated 10,000 realizations of  $y_k$  from the two-stage sampling distribution, with  $N = 600,000$ ,  $x_k = 3,312$ ,  $x'_k = 288$ ,  $n_k = 17,000$ , and  $m_k = 29$ , and constructed an approximation to the sampling distribution by the relative frequencies. Next, we compared the Poisson, Binom1, and Binom2 approximations to the approximated sampling distribution by the Kullback-Leibler distance, see Figure 7.

To put the use of KL distance for comparison into perspective, consider two Poisson distributions  $f_1$  and  $f_2$  with intensities  $\lambda_1$  and  $\lambda_2 = (1 + \epsilon)\lambda_1$ , where  $f_2$  can be viewed as a slight perturbation of  $f_1$ . For the two Poisson distributions we have:

$$KL(f_1, f_2) = \lambda_1 \log\left(\frac{\lambda_1}{\lambda_2}\right) + \lambda_2 - \lambda_1 = \lambda_1 \log\left(\frac{1}{1 + \epsilon}\right) + \lambda_1 \epsilon$$

A second order Taylor approximation of  $KL$  as function  $\epsilon$  yields

$$KL(f_1, f_2) \approx KL(0) + KL'(0)\epsilon + KL''(0)\frac{\epsilon^2}{2} = \lambda_1 \frac{\epsilon^2}{2} \quad (7)$$

In the simulations above, we have  $\lambda_1 = 2.32$ . If we plug this into (7) together with the simulated KLD, we get  $\epsilon = 0.042$  and  $\lambda_2 = 2.42$ , illustrating the proximity of the Poisson approximation.

### 4.3 Estimation of the current number of a specific variant

The main question of the paper is to estimate the distribution of the current number of the specific variant given past and current observations of the variant, i.e., the problem is to find

$p(x_k|y_0, \dots, y_k)$ .

This can be achieved by a traditional recursive Bayes filter with initial value

$$p(x_0|y_0) \propto p(y_0|x_0)p(x_0) \quad (8)$$

and

$$p(x_k|y_0, \dots, y_k) \propto p(y_k|x_k) \sum_{x_{k-1}} p(x_k|x_{k-1})p(x_{k-1}|y_0, \dots, y_{k-1}). \quad (9)$$

for  $k = 1, 2, 3, \dots$ . We notice that, all values for the recursion in (8) and (9) have been specified above in the epidemic model and observation models.

## 5 Data availability

Data on the weekly number of PCR tests and infected people from Danish Covid-19 test centers are publicly available from Statens Serum Institut at: <https://covid19.ssi.dk/overvagningsdata/download-fil-med-overvaagningdata>

Data on the number of WGS samples per week in the North Denmark region were obtained from the Danish Covid-19 Genome Consortium at: <https://www.covid19genomics.dk/statistics>

Data on Danish cluster5 samples were obtained from a dedicated S:Y453F (mink mutation) build at Nextstrain[4]: [https://nextstrain.org/groups/neherlab/ncov/S.Y453F?c=gt-S\\_453&f\\_clade\\_membership=Mink.Cluster5&f\\_region=Europe](https://nextstrain.org/groups/neherlab/ncov/S.Y453F?c=gt-S_453&f_clade_membership=Mink.Cluster5&f_region=Europe)

Population sizes in the municipalities in the North Denmark region were obtained from Statbank, Statistics Denmark: <https://www.dst.dk/en/Statistik/emner/befolkning-og-valg/befolkning-og-befolkningsfremskrivning>

## 6 Code availability

The R code and data are available at <https://github.com/HaemAalborg/cluster5>. A Shiny app that can be used to run the algorithms is available at <https://covid19vocmonitor.aau.dk>.

## References

- [1] Linda J.S. Allen. A primer on stochastic epidemic models: Formulation, numerical simulation, and analysis. *Infectious Disease Modelling*, 2(2):128–142, 2017.
- [2] Anette Boklund, Anne Sofie Hammer, Michelle Lauge Quaade, Thomas Bruun Rasmussen, Louise Lohse, Bertel Strandbygaard, Charlotte Sværke Jørgensen, Ann Sofie Olesen, Freja Broe Hjerpe, Heidi Huus Petersen, Tim Kåre Jensen, Sten Mortensen, Francisco F. Calvo-Artavia, Stine Kjær Lefèvre, Søren Saxmose Nielsen, Tariq Halasa, Graham J. Belsham, and Anette Bøtner. SARS-CoV-2 in danish mink farms: Course of the epidemic and a descriptive analysis of the outbreaks in 2020. *Animals*, 11(1), 2021.
- [3] Martin Enserink. SARS: Chronology of the epidemic. *Science*, 339(6125):1266–1271, 2013.

- [4] James Hadfield, Colin Megill, Sidney M Bell, John Huddleston, Barney Potter, Charlton Callender, Pavel Sagulenko, Trevor Bedford, and Richard A Neher. Nextstrain: real-time tracking of pathogen evolution. *Bioinformatics*, 34(23):4121–4123, 2018.
- [5] William Ogilvy Kermack and A. G. McKendrick. Contributions to the mathematical theory of epidemics. II. —The problem of endemicity. *Proceedings of the Royal Society of London. Series A, Containing Papers of a Mathematical and Physical Character*, 138(834):55–83, 1932.
- [6] Denise Kühnert, Tanja Stadler, Timothy G. Vaughan, and Alexei J. Drummond. Phylodynamics with Migration: A Computational Framework to Quantify Population Structure from Genomic Data. *Molecular Biology and Evolution*, 33(8):2102–2116, 2016.
- [7] Qun Li, Lei Zhou, Minghao Zhou, Zhiping Chen, Furong Li, Huanyu Wu, Nijuan Xiang, Enfu Chen, Fenyang Tang, Dayan Wang, Ling Meng, Zhiheng Hong, Wenxiao Tu, Yang Cao, Leilei Li, Fan Ding, Bo Liu, Mei Wang, Rongheng Xie, Rongbao Gao, Xiaodan Li, Tian Bai, Shumei Zou, Jun He, Jiayu Hu, Yangting Xu, Chengliang Chai, Shiwen Wang, Yongjun Gao, Lianmei Jin, Yanping Zhang, Huiming Luo, Hongjie Yu, Jianfeng He, Qi Li, Xianjun Wang, Lidong Gao, Xinghuo Pang, Guohua Liu, Yansheng Yan, Hui Yuan, Yuelong Shu, Weizhong Yang, Yu Wang, Fan Wu, Timothy M. Uyeki, and Zijian Feng. Epidemiology of Human Infections with Avian Influenza A(H7N9) Virus in China. *New England Journal of Medicine*, 370(6):520–532, 2014.
- [8] Arkaprava Roy and Sayar Karmakar. Analyzing initial stage of COVID-19 transmission through Bayesian time-varying model. *arXiv e-prints*, page arXiv:2004.02281, 2020.
- [9] Lucy van Dorp, Cedric CS Tan, Su Datt Lam, Damien Richard, Christopher Owen, Dorothea Berchtold, Christine Orengo, and François Balloux. Recurrent mutations in SARS-CoV-2 genomes isolated from mink point to rapid host-adaptation. *bioRxiv*, page 2020.11.16.384743, 2020.
- [10] Darcy Vavrek, Lucia Speroni, Kirsten J. Curnow, Michael Oberholzer, Vanessa Moeder, and Phillip G. Febbo. Genomic surveillance at scale is required to detect newly emerging strains at an early timepoint. *medRxiv*, page 2021.01.12.21249613, 2021.
- [11] Reza Yaesoubi and Ted Cohen. Generalized Markov models of infectious disease spread: A novel framework for developing dynamic health policies. *European Journal of Operational Research*, 215(3):679–687, 2011.

## Acknowledgements

The authors gratefully acknowledge the Novo Nordisk Foundation’s support to the COVID-19-CTRL Project and the Poul Due Jensen Foundation’s support through the BEO-COVID Project.

## Author contributions

The mathematical model was derived by HS, TK, and MB. JS provided input to the mathematical model. Implementation in R and analysis were done by MB and RB. The manuscript was drafted by HS, TK, and MB. All authors read and approved the final manuscript.

## Competing interests

The authors declare no competing interests.
